# Supplementary material
Source: publisher site journal article supplement (https://www.dovepress.com/article/519747)
Supplement: Supplementary file 1 [file 519747-Supplementary%20Table%201.docx]

Supplementary table 1. Compared the changes in every time point.

|  | **Year** | **DHE (N=1018)** | | **non-DHE (N=192)** | | ***p*** |
| --- | --- | --- | --- | --- | --- | --- |
|  | **MEAN** | **SD** | **MEAN** | **SD** |
|  | **0** | 9.72 | 1.58 | 10.25 | 14.78 | 0.165 |
| **HbA1c** | **0.5** | 7.56 | 1.29 | 7.52 | 2.35 | 0.692 |
| **1** | 7.12 | 1.20 | 7.39 | 2.29 | 0.755 |
| **1.5** | 7.12 | 1.17 | 6.79 | 1.69 | 0.014* |
| **2** | 7.01 | 1.18 | 8.00 | 1.86 | 0.884 |
| **2.5** | 7.08 | 1.19 | 6.88 | 1.41 | 0.616 |
| **3** | 7.00 | 1.18 | 7.35 | 1.67 | 0.652 |
| **3.5** | 6.17 | 1.10 | 7.13 | 1.93 | 0.601 |
| **4** | 6.18 | 1.10 | 7.22 | 1.79 | 0.724 |
| **4.5** | 6.17 | 1.10 | 7.94 | 1.44 | 0.502 |
| **5** | 6.12 | 1.06 | 7.25 | 2.04 | 0.355 |
|  | **0** | 142.31 | 44.31 | 122.92 | 47.17 | 0.1 |
| **Glucose AC** | **0.5** | 140.72 | 41.40 | 135.85 | 48.74 | 0.409 |
| **1** | 140.14 | 42.15 | 121.71 | 40.27 | 0.012* |
| **1.5** | 138.24 | 38.53 | 129.00 | 36.12 | 0.245 |
| **2** | 138.75 | 39.90 | 135.59 | 44.31 | 0.746 |
| **2.5** | 136.49 | 37.63 | 123.73 | 75.50 | 0.191 |
| **3** | 138.11 | 41.10 | 107.08 | 53.01 | 0.052 |
| **3.5** | 136.59 | 37.73 | 115.10 | 34.38 | 0.072 |
| **4** | 137.04 | 38.25 | 133.50 | 27.70 | 0.771 |
| **4.5** | 136.78 | 39.07 | 144.50 | 34.40 | 0.578 |
| **5** | 136.05 | 38.46 | 119.14 | 41.50 | 0.81 |
|  | **0** | 162.32 | 39.58 | 175.34 | 47.17 | 0.001** |
| **TC** | **0.5** | 162.32 | 39.58 | 174.70 | 48.74 | 0.006** |
| **1** | 154.91 | 34.78 | 169.00 | 40.27 | 0.001** |
| **1.5** | 154.91 | 34.78 | 162.60 | 36.12 | 0.001** |
| **2** | 152.18 | 33.83 | 165.63 | 44.31 | 0.001** |
| **2.5** | 152.18 | 33.83 | 166.68 | 75.50 | 0.002** |
| **3** | 152.21 | 31.94 | 162.34 | 53.01 | 0.032* |
| **3.5** | 152.21 | 31.94 | 145.22 | 34.38 | 0.066 |
| **4** | 151.94 | 32.62 | 156.78 | 27.70 | 0.063 |
| **4.5** | 151.94 | 32.62 | 162.73 | 34.40 | 0.012* |
| **5** | 150.34 | 29.55 | 162.25 | 41.50 | 0.005* |
|  | **0** | 164.07 | 99.82 | 123.20 | 82.05 | 0.033** |
| **TG** | **0.5** | 146.92 | 120.45 | 134.27 | 163.68 | 0.001** |
| **1** | 146.92 | 120.45 | 127.83 | 124.55 | 0.371 |
| **1.5** | 143.76 | 132.66 | 123.52 | 70.60 | 0.5 |
| **2** | 143.76 | 132.66 | 117.46 | 73.57 | 0.327 |
| **2.5** | 136.68 | 87.69 | 141.22 | 101.49 | 0.302 |
| **3** | 136.68 | 87.69 | 161.44 | 185.86 | 0.267 |
| **3.5** | 134.38 | 84.75 | 153.49 | 148.90 | 0.179 |
| **4** | 134.38 | 84.75 | 158.49 | 770.90 | 0.156 |
| **4.5** | 130.88 | 80.91 | 160.95 | 521.16 | 0.112 |
| **5** | 130.88 | 80.91 | 153.49 | 236.01 | 0.427 |
|  | **0** | 98.51 | 34.38 | 110.76 | 38.97 | 0.001** |
| **LDL** | **0.5** | 91.38 | 30.21 | 103.87 | 37.79 | 0.003** |
| **1** | 91.38 | 30.21 | 102.61 | 28.34 | 0.001** |
| **1.5** | 87.82 | 28.46 | 103.64 | 35.09 | 0.008** |
| **2** | 87.82 | 28.46 | 104.33 | 33.51 | 0.001** |
| **2.5** | 88.30 | 27.24 | 95.47 | 33.40 | 0.002** |
| **3** | 88.30 | 27.24 | 91.76 | 32.08 | 0.001** |
| **3.5** | 87.41 | 26.81 | 90.15 | 26.26 | 0.006** |
| **4** | 87.41 | 26.81 | 96.77 | 26.53 | 0.002** |
| **4.5** | 85.84 | 25.65 | 100.53 | 30.32 | 0.039 |
| **5** | 85.84 | 25.65 | 89.00 | 23.82 | 0.116 |
|  | **0** | 49.63 | 14.32 | 58.15 | 20.83 | <0.001*** |
| **HDL** | **0.5** | 49.77 | 14.14 | 60.10 | 21.08 | <0.001*** |
| **1** | 49.77 | 14.14 | 60.00 | 18.36 | <0.001*** |
| **1.5** | 50.13 | 14.64 | 59.18 | 20.35 | <0.001*** |
| **2** | 50.13 | 14.64 | 55.46 | 16.84 | 0.001** |
| **2.5** | 50.54 | 14.91 | 50.89 | 15.99 | 0.021 |
| **3** | 50.54 | 14.91 | 50.17 | 14.03 | 0.133 |
| **3.5** | 50.94 | 14.54 | 50.36 | 17.63 | 0.205 |
| **4** | 50.94 | 14.54 | 51.50 | 9.99 | 0.989 |
| **4.5** | 50.94 | 14.46 | 50.00 | 9.06 | 0.2 |
| **5** | 50.94 | 14.46 | 53.80 | 11.78 | 0.99 |

HbA1c: glycated hemoglobin; glucose AC: fasting glucose; TC: total cholesterol, LDL: low-density lipoprotein cholesterol; HDL: high-density lipoprotein cholesterol; TG: triglyceride. *:p<0.05;**:p<0.01;***:p<0.001.
